# Supplementary material for: The impact of lipid-based nutrient supplementation on anti-malarial antibodies in pregnant women in a randomized controlled trial
Source: Malar J. 2015 May 10;14:193. doi: 10.1186/s12936-015-0707-2 (PMC4438573; doi:10.1186/s12936-015-0707-2)
Supplement: Additional file 3: — Seropositivity to malaria antigens at 36 gestation weeks. [file 12936_2015_707_MOESM3_ESM.doc]

**Additional file 3:** Seropositivity to malaria antigens at 36 gestation weeks

|  | **Proportion of seropositives by supplementation groupa** | | | | **LNS (n=337) compared to IFA (n=325)c** | | | **LNS (n=337) compared to MMN (n=347)c** | | |
| --- | --- | --- | --- | --- | --- | --- | --- | --- | --- | --- |
|  | **IFA** | **MMN** | **LNS** | **P-valueb** | **OR (95 % CI)** | **Adjusted OR (95 % CI)** | **Adjusted P-valued** | **OR (95 % CI)** | **Adjusted OR (95 % CI)** | **Adjusted P-valued** |
| IgG to placental-binding isolate VSA | 273/312 (87.5%) | 307/334 (91.9%) | 286/321 (89.1%) | 0.176 | 1.08 (0.85, 1.38) | 1.51 (0.90, 2.52) | 0.119 | 0.72 (0.42, 1.22) | 0.94 (0.34, 2.58) | 0.907 |
| Opsonising antibodies to placental-binding isolate VSA | 307/325 (94.4%) | 327/347 (94.2%) | 313/336 (93.1%) | 0.751 | 0.89 (0.65, 1.23) | 1.20 (0.73, 2.00) | 0.471 | 0.83 (0.45, 1.55) | 1.82 (0.67, 4.94) | 0.242 |
| Opsonising antibodies to non-placental-binding isolate VSA | 286/321 (89.1%) | 320/345 (92.8%) | 306/336 (91.1%) | 0.256 | 1.12 (0.86, 1.44) | 1.26 (0.79, 2.00) | 0.334 | 0.80 (0.46, 1.39) | 0.97 (0.38, 2.48) | 0.956 |
| MSP-1 19kD | 193/318 (60.7%) | 217/343 (63.3%) | 208/333 (62.5%) | 0.786 | 1.04 (0.89, 1.22) | 1.00 (0.77, 1.30) | 0.996 | 0.97 (0.71, 1.32) | 0.87 (0.51, 1.50) | 0.626 |
| MSP-2 | 220/318 (69.2%) | 248/343 (72.3%) | 229/333 (68.8%) | 0.548 | 0.99 (0.84, 1.17) | 0.87 (0.66, 1.15) | 0.334 | 0.84 (0.61, 1.17) | 0.58 (0.33, 1.01) | 0.054 |
| MSP-3 | 217/318 (68.2%) | 223/343 (65.0%) | 233/333 (70.0%) | 0.376 | 1.04 (0.88, 1.23) | 0.97 (0.75, 1.25) | 0.792 | 1.25 (0.91, 1.73) | 1.17 (0.72, 1.88) | 0.526 |
| EBA-175 | 130/318 (40.9%) | 159/343 (46.4%) | 139/333 (41.7%) | 0.305 | 1.02 (0.87, 1.19) | 0.96 (0.75, 1.22) | 0.724 | 0.83 (0.61, 1.12) | 0.77 (0.47, 1.26) | 0.302 |
| PfRh2 | 186/318 (58.5%) | 197/343 (57.4%) | 198/333 (59.5%) | 0.867 | 1.02 (0.87, 1.19) | 1.03 (0.82, 1.29) | 0.811 | 0.90 (0.57, 1.40) | 0.87 (0.55, 1.39) | 0.570 |
| Schizont extract | 213/249  (85.5%) | 236/266  (88.7%) | 215/256  (84.0%) | 0.279 | 0.94 (0.74, 1.20) | 1.06 (0.73, 1.53) | 0.754 | 0.67 (0.40, 1.11) | 0.77 (0.35, 1.72) | 0.529 |

aData presented as number (proportion of women) seropositive to each malaria antigens at 36 gw. Seropositivity calculated as sample mean fluorescence intensity (FI) > Mean FI of negative control + 3X standard deviation of the negative controls. bP-value calculated following Chi2 test between the proportion of participants with seropositivity to each antigen cData presented as odds ratios of seropositivity between LNS group compared to IFA (reference group) and LNS compared to MMN (reference group) (95% confidence interval) unadjusted and adjusted for confounders gravidity, maternal age, HIV, malaria infection at enrolment, bed net use, socioeconomic status, location of residence and antibody levels at enrolment dP-value adjusted for the above confounders
