# Supplementary material for: The impact of lipid-based nutrient supplementation on anti-malarial antibodies in pregnant women in a randomized controlled trial
Source: Springer Nature journal article supplement (doi:10.1186/s12936-015-0707-2), 2015-05-09
Supplement: MOESM1 [file 9761290]

**Additional file 1:** Plasma IgG at enrolment and at 36 gestation weeks

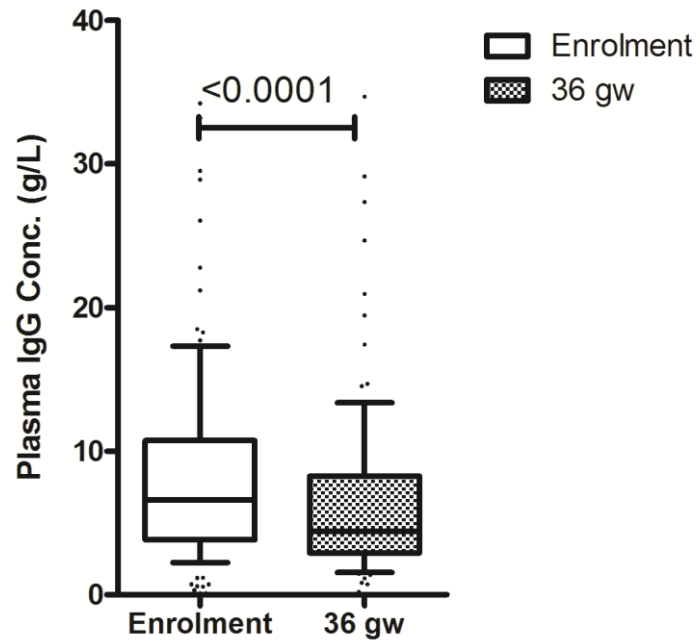

Data presented as box plot with the whiskers representing 10<sup>th</sup> and the 90<sup>th</sup> percentiles with outliers. Y axis presents plasma IgG concentration in g/L calculated from the standard curve created by purified human IgG. Wilcoxon matched pair test performed for comparison of antibody levels between enrolment and 36 weeks. Total plasma IgG significantly reduced ( $p<0.0001$ ) by 36 weeks compared to the levels at enrolment. Plasma IgG concentration was measured in a subset of women (n=150).
