# Supplementary material for: The impact of lipid-based nutrient supplementation on anti-malarial antibodies in pregnant women in a randomized controlled trial
Source: Springer Nature journal article supplement (doi:10.1186/s12936-015-0707-2), 2015-05-09
Supplement: MOESM5 [file 9761290]

# Additional file 5: IgG subclass measurements for merozoite antigens and schizont extract at enrolment and at 36 weeks

## (A) MSP-1 19kD

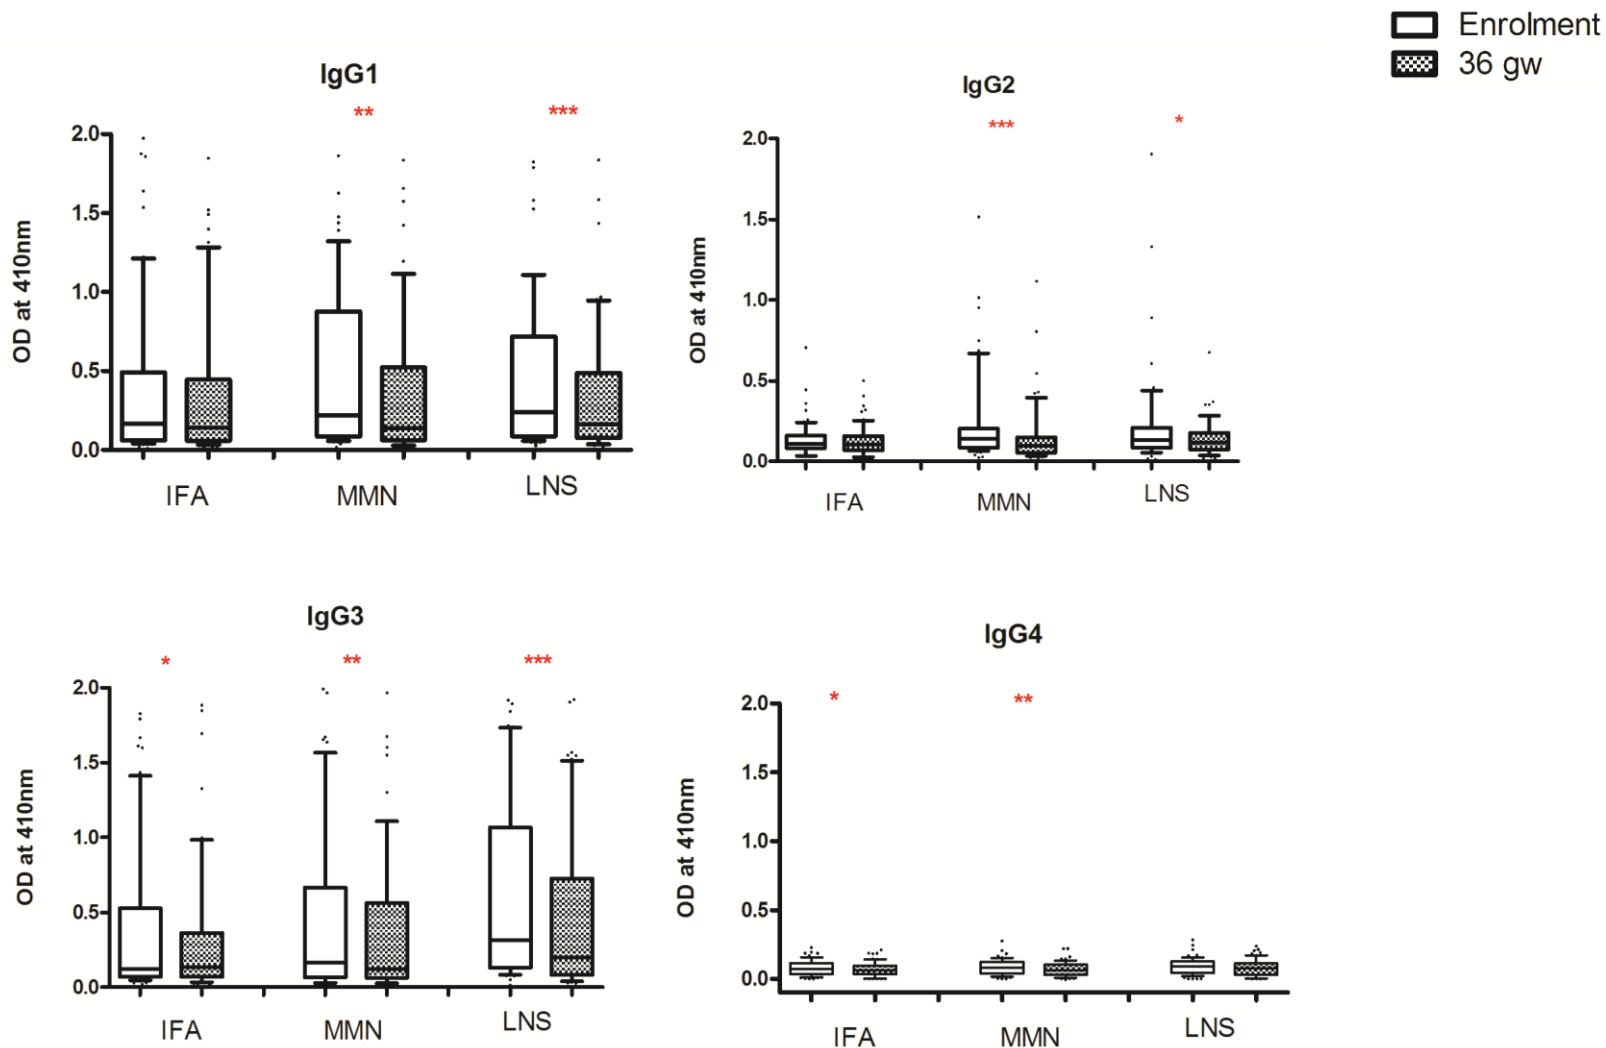

(B) **MSP-2**

Enrolment  
36 gw

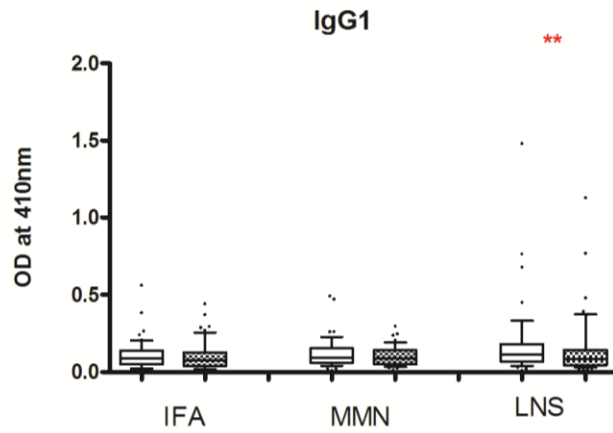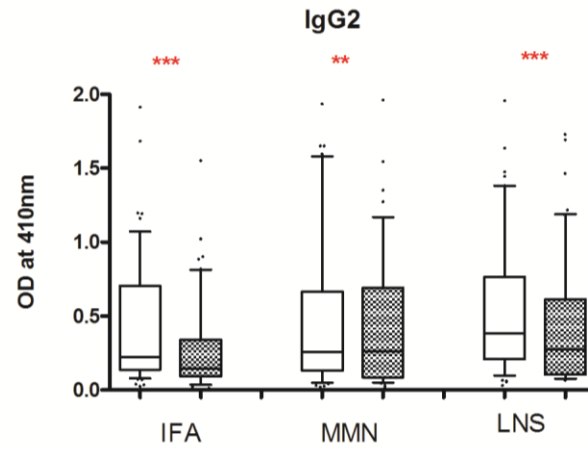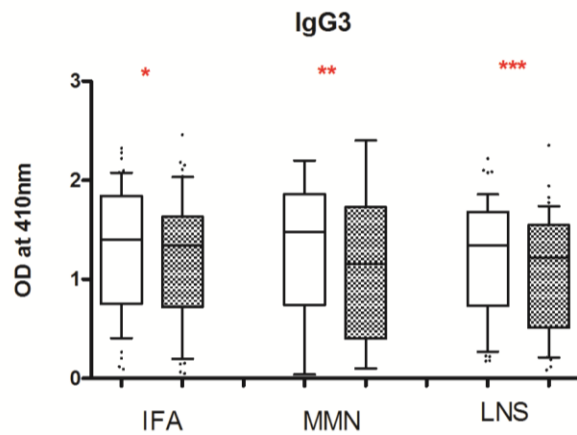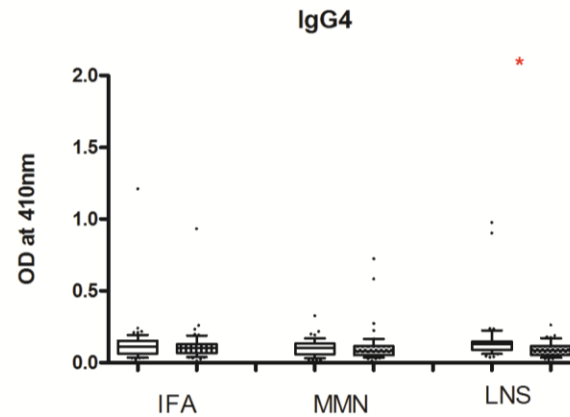

(C) **MSP-3**

Enrolment  
36 gw

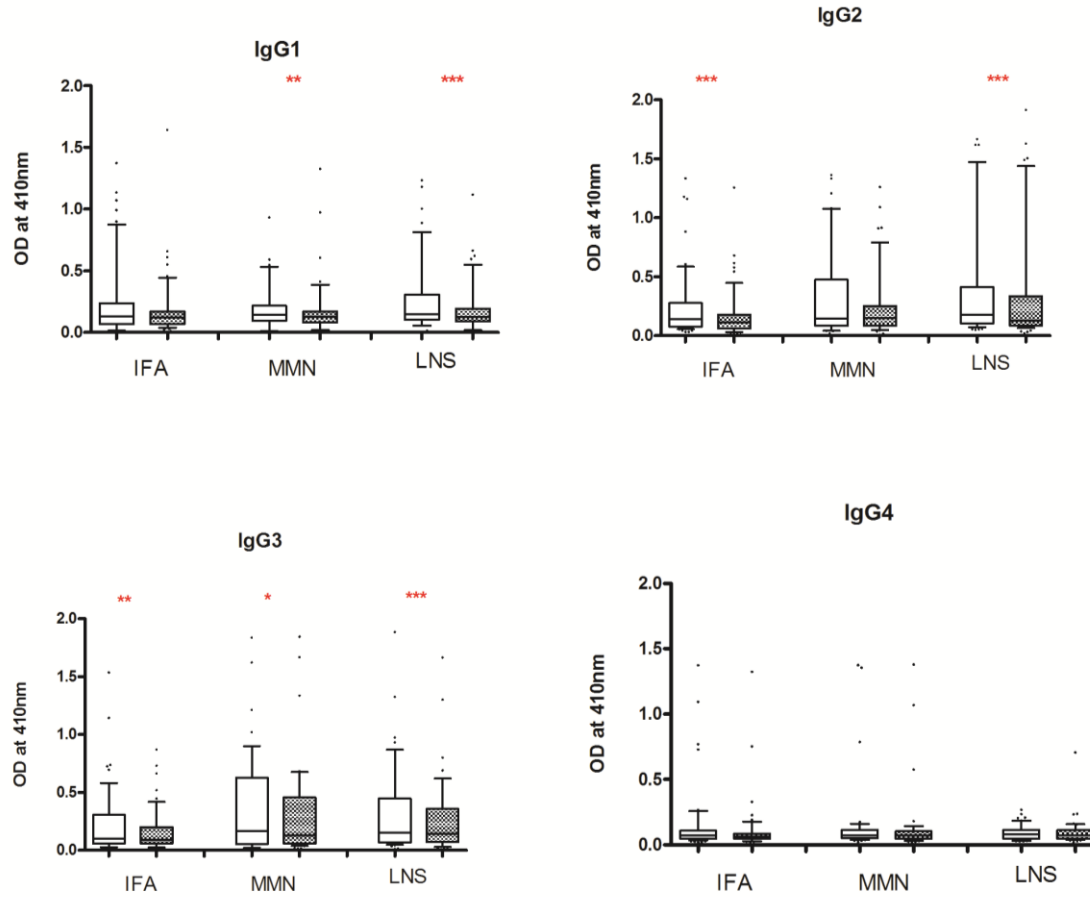

(D)

## PfRh2

Enrolment  
36 gw

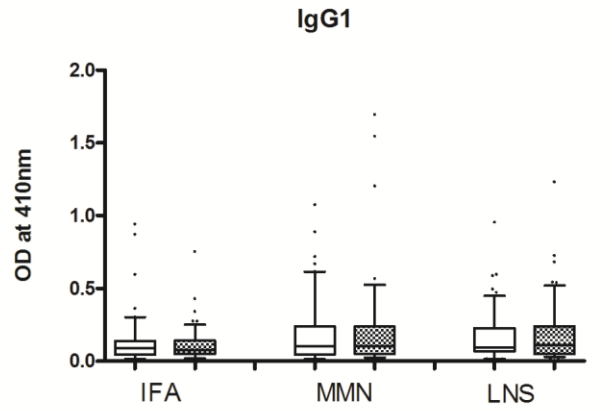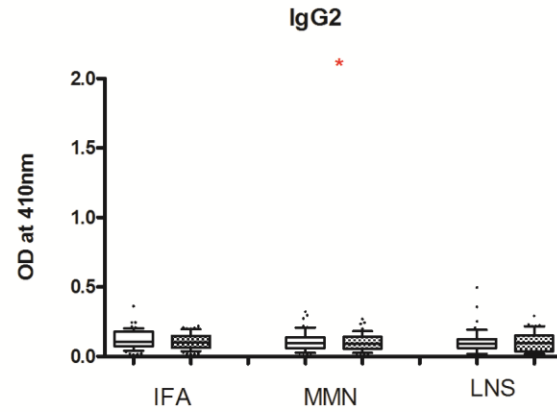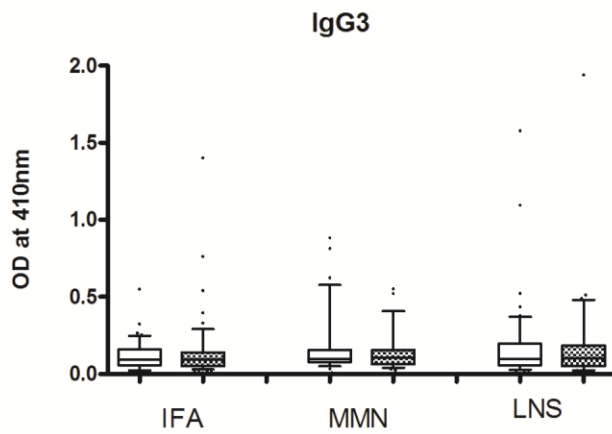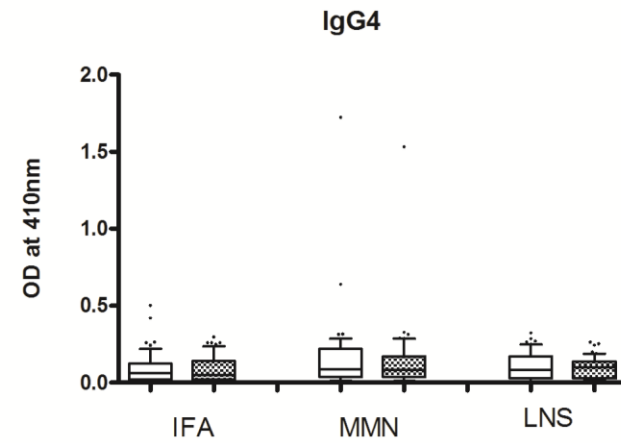

(E) **EBA-175**

Enrolment  
36 gw

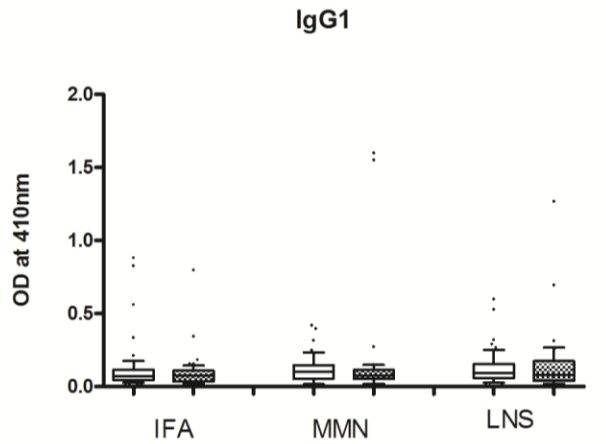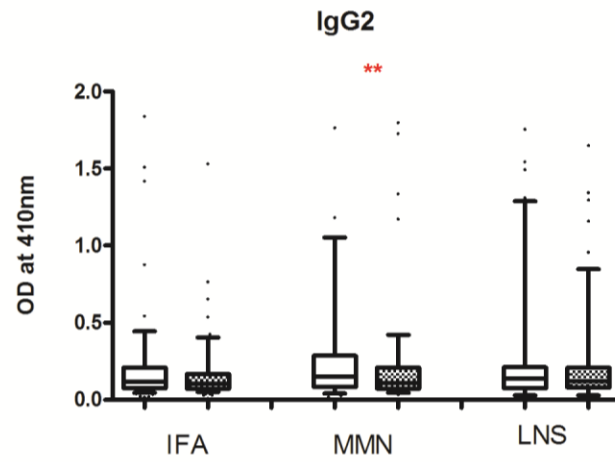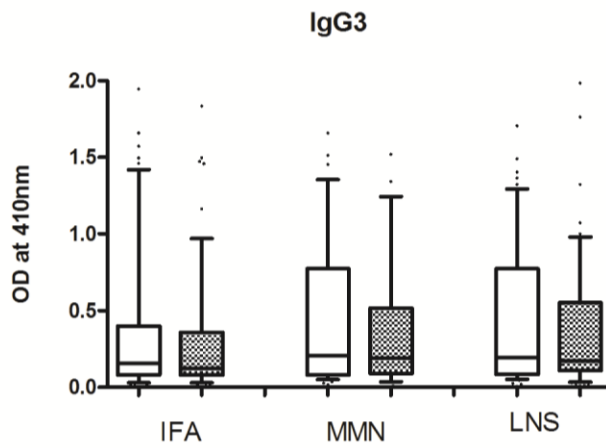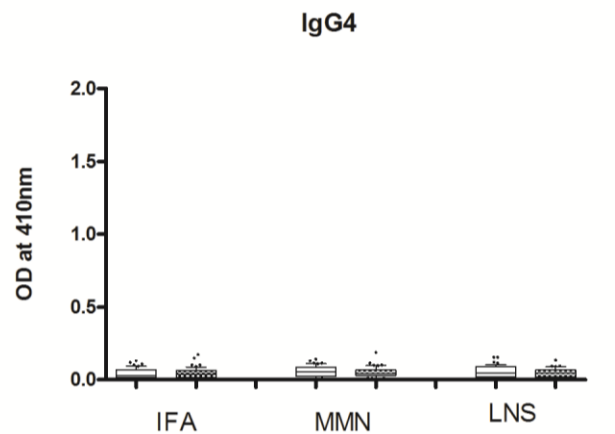

(F) **Schizont extract**

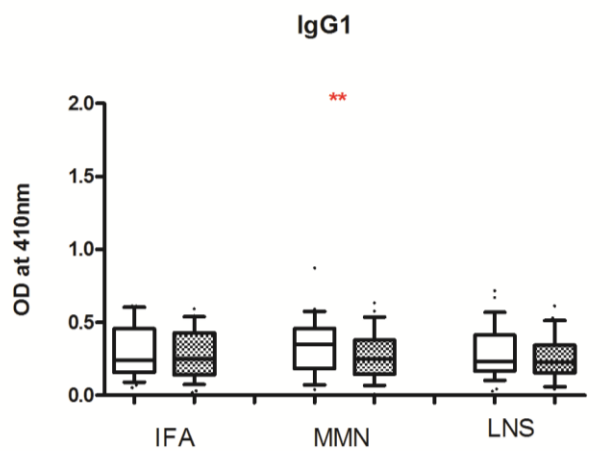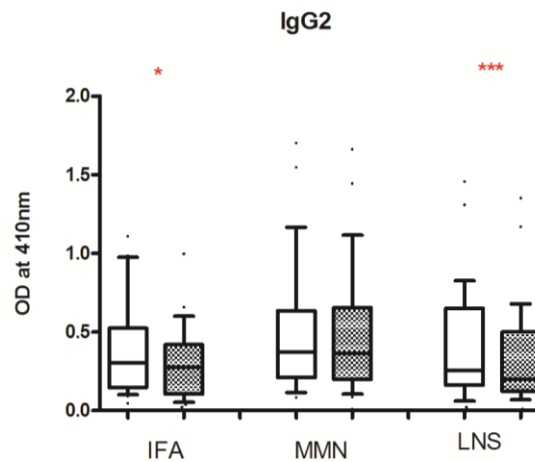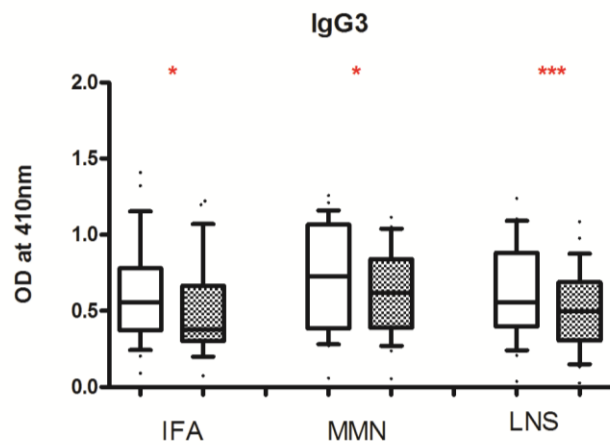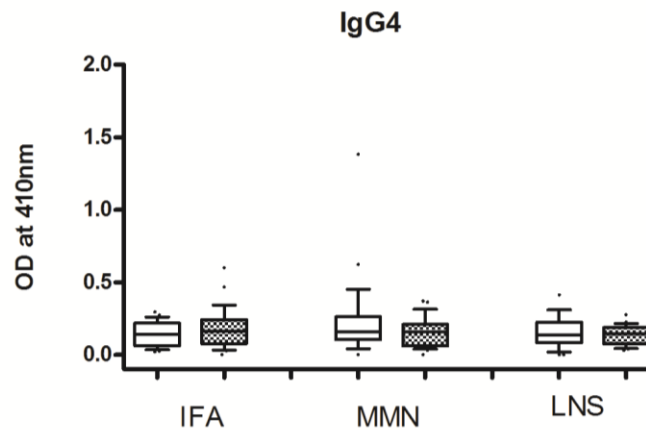

Antibody IgG subclasses presented as optical density (OD) measured at 410nm, categorized by supplementation groups for antigens MSP-1 19kD, MSP-2, MSP-3, PfRh2, EBA-175 and schizont extract (A-F). Kruskal Wallis test performed to determine subclass level differences between supplementation groups (IFA and LNS, MMN and LNS). Wilcoxon matched-pair test was performed for comparing subclass levels between enrolment and 36 gw. No significant differences in subclass levels across the supplementation groups were observed. Subclass levels at enrolment and 36 weeks were significantly different, denoted as  $P < 0.05$  \*,  $p < 0.005$  \*\*,  $p < 0.0001$  \*\*\*. IFA (n=50), MMN (n=50), LNS (n=50).
